# Supplementary material
Source: PubMed Central journal article supplement (PMC3682482)
Supplement: NIHMS177347-supplement-Supplementary_data.pdf [file NIHMS177347-supplement-Supplementary_data.pdf]

Ec 941 REK----- 561  
Tq 1060 ATPSVSAVFAGARAEKRE----- 1077  
Pf 1254 MKRKKICTLNNKRANAKKVVHVNHLNEVVDKDTQLHKENNNNNMNSGNVENCKLKNKESYGYNNSSNCINTNNINIENNICHDISINKNIKVITNNSSNISNNENVTNLNCVSRAGSHHIYKKEKESIGSDDTNILSAQNSNNNFSCNNENMKNVDDVNVLE 1423  
Bb 1071 PIDSK----- 1075  
Tc 924 RM----- 925  
Lm 922 RM----- 923  
Sc 980 HG----- 981  
Hs 933 PH----- 934

Ec 944 ----- 561  
Tq 1078 ----- 1077  
Pf 1424 NDTKKREDINTTTVMEGQNSVINNNKKNKENSLLKGEDEEDIVMVNLKKNENYSVINNVDCRKKMDMGKNINDECKTYKKNYKDMGLNINIIVDELNSGTSHSTNDHLYLDNFNTSDEEIGNKNMMDYLSKEKSISKNKPNGNSYVVVDVSVYNNYKINKMKELIDNENL 1593  
Bb 1076 ----- 1075  
Tc 926 ----- 925  
Lm 924 ----- 923  
Sc 982 ----- 981  
Hs 935 ----- 934

Ec 944 ----- 561  
Tq 1078 ----- 1077  
Pf 1594 NDEYNNNNMNSNYNNASAFVNGKDRNDNLENDICEKNMDHTYKHYNRLNRRSTNERMMLMVNNEKESNHEKGHRNGLNKNKKNKMKGNKKNKKNYHYVNHKRNNENYNNIENSKFNNYVDDINKKEYYEDENDIYFFTHSSQGNDDLSNDNYSSEELNTD 1763  
Bb 1076 ----- 1075  
Tc 926 ----- 925  
Lm 924 ----- 923  
Sc 982 ----- 981  
Hs 935 ----- 934

Ec 944 ----- 561  
Tq 1078 ----- 1077  
Pf 1764 EYDDDDYYDEDEDDYDDDDDDDDDDGEDEEDNDYNDGDYDYNLSSRSISDVSIIYSGNENIENKYNIDIGFKIIDNRNEKEKEKCKFIVLGCYRIGSSVEFDWSAIVHCKVTRKLNKHAAILNINCPETVSTDYDESRLYFDEITTEVIKFIYFNFSN 1933  
Bb 1076 ----- 1157  
Tc 926 ----- 1000  
Lm 924 ----- 998  
Sc 982 ----- 1056  
Hs 935 ----- 1009

Ec 1019 GVIVYGGQTPKLARALEAAGVPIGTSFDAIDRAEDRERFQHAVERLKLKQANATVTAIEMAVEKAKEIGYPLVVRPSYVLGGRAMEIVYDEADLRRYFQTAVSVNDAPVLLDHFLLDDAVEVDVDAI--CDGEMVLIGGIMEHIEQAGVHSGDSACSLPAYTSLQE 805  
Tq 1192 GVIIISVGGQTPNLTCSALEKQGVRIIGTSVAADCCEDRHKFSRLCDELNIDQPRWKEFTDLRTAKAPQEVGYVPLVVRPSYVLGGAAMRVVTDDEQLDAFLKIAAVVSGESPVVISKFVENAKEVEFDVSVACRGE--IVNFAISEHVENAGTHSGDATLILPGQKLYVET 1360  
Pf 1934 GVIIAFGGQTSNNLVSFLYKNNVNLILGSHVHKLIVVVKIGINF--RTYVILKIDQPKWNKFTKLSKAIQFANEVKKFVPLVVRPSYVLGGAAMRVVNCPEELKNFLMKAIVSKDNPPVVISKFIENAKEIETIDCVSKNGK--IINYAISEHVENAGVHSGDATLILPAQNIYVET 2101  
Bb 1158 GIVISVGGQTSNNLALQFHSGLPILGTSVESIDSCEDRYSFSEVVCVSGFDHDTCEMEFTSPEGAKQFCTKVSFPVLVVRPSYVLGGAAMRVVISPFELEKYLQTSAVVNRHEHPVVISKFIENAKEVEVEVTVVHLYGYTTETPLVEHVEHAGTHSGDATLILPAQNIYVET 1327  
Tc 1001 GVVISLGGQIVQNMALRLKQGLPILGTPVNVKAENRHKFSKMCDELGVLPQEWLSTIEVQVHEFCQVGFPTLVVRPSYVLGGAAMRVVISAADINRYLEEAALVSGEHPVVVSKYEGAMEYDVIDVAHGR--VLCYAISEHVENAGVHSGDATMFLPPQNTKEV 1169  
Lm 999 GVVISLGGQIVQNMALRLKQGLPILGTPANIDMAEDRNFKSKMCDNLGVPQEWISATSVEQVHEFCDRVGYPALVVRPSYVLGGAAMRVVIANKEDVTRYLKEASVSGEHPVVVSKYEDATEYDVIDVAHGR--VLCYGLISEHVENAGVHSGDATMFLPPQNTKDT 1167  
Sc 1057 GVVISMGQTSNNIAMLHRENVKILGTSFDMIDSAENRYKFSRMLDQIGVDQPAWKEKLSMDEAESFAEKVGYVPLVVRPSYVLGGAAMRVVYSKNDLESYLNQAVEVSRDYPVVISKFIENAKEIEMDAVARNGE--LVMHVVSEHVENAGVHSGDATLIVPPQDLAPET 1225  
Hs 1010 GVVISMGQTSNNIAMLHRENVKILGTSFDMIDSAENRYKFSRMLDQIGISQVRELSDLESARQCFQVGYPCVVRPSYVLGGAAMRVVAYADGDLERFLLSSAAVSKHEHPVVISKFIQEAKEIDVDAVASDGV--VAAIAISEHVENAGVHSGDATVTPPQDITAKT 1178

Ec 1188 QDVMRQQVQKLAFELQVRGLMNQVFAVK--NNEVYLIEVNPRARTVFPVSKATGVPLAKVAARVMAGKSLAEQGVTKVEIPYYSVKEVVLVFNKFPVGDPLPGLPEMRSTGEVMVGRTFAEAFAKAQLGSNSTMKKHGRALLSVREGDKER--VVDLAAKLLKQGFELD 972  
Tq 1361 IRRVKKISQKLARALQVSGPFNIQFICK--QNDVKVIECNLRASRTFPFISKAFNVNLDLATAKVMIG--APVTPLPIHLMDLSFVVCVVPVFSFARLRCGDPVLGVEMRSTGEVACFGASKHEAFKALISAGVPLPLEKRTILISAGPLWSKMELEPYFKILLDGLGFTIY 1528  
Pf 2102 HRKIKKISEKISKSLNISGPFNIQFICH--QNEIKIECNLRASRTFPFISKALNLFIDLATRILMG--YDVKPINSILIDLEYTAVKAPISFNRLHGSDCILGVEMRSTGEVACFGASKHEAFKALISAGVPLPLEKRTILISAGPLWSKMELEPYFKILLDGLGFTIY 2267  
Bb 1328 HRAVKKIREFSRYLNYDGPFNQVLYCK--NNEIKIECNLRASRTLPFISKTLNLFIDQATRVVMVG--SPARVHNIQLMDIDYVAVKVPVFSFARLRCGDPVLGVEMRSTGEVACFGASKHEAFKALISAGVPLPLEKRTILISAGPLWSKMELEPYFKILLDGLGFTIY 1493  
Tc 1170 MKRIYNTTALIAEELDVVGMNIIQFLFTKDKQLRVIEANIRSSRSVFPVSKTLGIFSPAVMVSFAFLSQHSDNLPVIKRARMTHIGCKASVFSFNRLAGADPLGVEMASTGEIVGFGRDKHEVFLKAMLCQNFRIY--QRGVFISCDVDAMAEDLCPPLS--ASDRFPV 1335  
Lm 1168 MKRIYDVSNRVIAEELDVVGMNIIQFLFTKDKQLRVIEANIRSSRSVFPVSKTLGIFSPAVMVSFAFLSQHSDNLPVIKRARMTHIGCKASVFSFNRLAGADPLGVEMASTGEIVGFGRDKHEVFLKAMLCQNFRIY--QRGVFISCDVDAMAEDLCPPLS--ASDRFPV 1335  
Sc 1226 VDRIVVATAKIGKALKITGPNYIQFIK--DNEIKVIECNLRASRSFPFISKVGVNLIELATAKIMG--LPLTPYVVEKLPDDYVAVKVPQFSFRLAGADPLGVEMASTGEIVGFGRDKHEVFLKAMLCQNFRIY--QRGVFISCDVDAMAEDLCPPLS--ASDRFPV 1391  
Hs 1179 LERIKAVIHVAGQELQVTFPFLQLIK--DDQLKVEICNVRSRSPFVSKTLGVDLVALATRVIMG--EEVEPVGLMTG--SGVGVKVPQFSFRLAGADPLGVEMASTGEIVGFGRDKHEVFLKAMLCQNFRIY--QRGVFISCDVDAMAEDLCPPLS--ASDRFPV 1343

Ec 1355 AHTGTAIVLGEAGINPRLVNKHVEGRP-----HIQDRIKNGEYTIINTTSGR-----AIE [ T. gondii Regulatory domain indel ] -----DSRVIRRSALQYKHVYDTLNLGGFATAMALNADATEKVISVOEMHAQIK 1073  
Tq 1529 ATEGTYDFYKFLSFPNVNKGSKFHQRLLK-----GLRTPPTAESDADACIRAKYASIRIRVRKPIVGSNESHNGGQSPHALSLESKGVEMVINVPDSMNRHAGTNGYLMRRTATDCGVPLLTNVKVASMFVEALNKEAKEAQGRSFDWTRSDWEYWPQKN 1688  
Pf 2268 ATEGTYDFYKFLSFPNVNKGSKFHQRLLK-----VHNKNAENISPNITDLIMNKVEMVINITDTLKT-----KVSNGYKIRRLASDFQVPLITNMKLSLFDLSLYRKSFRQKERSYFTTKSYDYISLV 2391  
Bb 1494 CYKGYIRIPLINEVPASGASITKGLDVSQ-----LLACSLQFEDTIGSLLHVGSSHKCGRLCCFNLRKVS-----PRPELMKSVVHFMAINAGCAIPNRLSDGVYMRRAAVDNKVTLITCMKLAFLIDALVMRHIRTSGKGLFFHNKSQOEYLN 1645  
Tc 1336 TSKQTSRVLADYGIPTVTLQRHEDSE-----PTFDTAVAVKEKFDLVIQLRDKRDFMLRRCFQ-----ENATADYVIRRLAVDYNHSLTEPNVVMRFCEFTLDVVDVKEIEPEPFRLYVPRVYKMNENDNYTML 1460  
Lm 1336 GTANTAVALHEHYGIECEVLLQRSSELPSGDACESNRPAVYDEEVAKKEKFDLVIQLRDKRDFMLRRCFQ-----ETAPPDYVIRRLAVDYNHSLTEPNVVMRFCEFTLDVVDVKEIEPEPFRLYVPRVYKMNENDNYTML 1469  
Sc 1392 ATSGTADLSEHGIAVQLEVLNKKDDDDQKS-----EYSLTQHLANNEIDLINLPSANR--FRPPASV-----SKGYTRRLAVDYNHSLTEPNVVMRFCEFTLDVVDVKEIEPEPFRLYVPRVYKMNENDNYTML 1500  
Hs 1344 ASLGTADPYTEHGKVTAVDWHFEEAVDGECP-----PQRSILEQLAEKNFELVINLSMRGAGGRRLSSFV-----TKGYTRRLAVDYNHSLTEPNVVMRFCEFTLDVVDVKEIEPEPFRLYVPRVYKMNENDNYTML 1455

Tc 1461 HRHKVGLCITSTNDKSVLAISLREEKIALTCFHACLGGIKNNSEEIAEQFRSISGTSRAHRHPH 1524  
Lm 1470 RCHKVLMITDNNKSKVLAIRLSQEGELNI'CFPHGYLGG-----D-----IGQFEQAFQRP 1520
